# Supplementary material for: Photochemical, Anatomical, and Growth Changes in Cassava Cultivars after Application of Post-Emergent Herbicides
Source: MDPI journal article supplement (doi:10.3390/agriculture12070950), 2022-06-30
Supplement: s1 [file s1]

**Supplementary Table S1.** Net photosynthetic rate - *A*, stomatal conductance - *gs*, transpiration rate - *E* and maximal quantum yield of PSII photochemistry - *Fv/Fm* of two *M. esculenta* Crantz varieties (Campinas and Sergipana) after application of chemical molecules.

| Treatments         | Varieties                                                                               |            |             |            |              |                                                                                         |            |            |            |            |
|--------------------|-----------------------------------------------------------------------------------------|------------|-------------|------------|--------------|-----------------------------------------------------------------------------------------|------------|------------|------------|------------|
|                    | Campinas                                                                                |            |             |            |              | Sergipana                                                                               |            |            |            |            |
|                    | Photosynthetic rate ( <i>A</i> ) [ $\mu\text{mol (CO}_2\text{) m}^{-2}\text{ s}^{-1}$ ] |            |             |            |              | Photosynthetic rate ( <i>A</i> ) [ $\mu\text{mol (CO}_2\text{) m}^{-2}\text{ s}^{-1}$ ] |            |            |            |            |
|                    | 0                                                                                       | 24         | 48          | 72         | 168          | 0                                                                                       | 24         | 48         | 72         | 168        |
| Positive Control   | 13.41 a B                                                                               | 14.70 a AB | 15.53 a A   | 15.38 a A  | 14.87 a AB   | 9.51 a A                                                                                | 9.85 a A   | 11.37 ab A | 11.60 a A  | 12.13 ab A |
| Negative Control   | 12.81 a A                                                                               | 12.24 b A  | 13.12 bcd A | 13.64 ab A | 13.55 ab A   | 9.95 a A                                                                                | 9.60 a A   | 10.44 b A  | 10.81 ab A | 11.32 ab A |
| Fomesafen          | 12.04 a BC                                                                              | 10.74 bc C | 14.60 ab A  | 12.21 b BC | 13.85 abc AB | 8.99 a B                                                                                | 9.82 a B   | 15.84 a A  | 9.97 ab B  | 10.89 ab B |
| Fenoxaprop-p-ethyl | 12.35 a AB                                                                              | 10.45 bc C | 13.85 abc A | 8.45 c D   | 11.55 cd BC  | 11.36 a AB                                                                              | 11.26 a AB | 14.78 ab A | 6.22 b C   | 9.29 b BC  |
| Fluazifop-p-butyl  | 12.43 a A                                                                               | 9.53 c C   | 11.52 d AB  | 3.12 d D   | 9.65 d BC    | 11.41 a AB                                                                              | 10.20 a AB | 10.98 b AB | 7.08 ab B  | 14.01 a A  |
| Clethodim          | 12.04 a AB                                                                              | 10.63 bc B | 12.54 cd A  | 6.63 c C   | 12.38 bc AB  | 9.36 a AB                                                                               | 10.71 a AB | 13.82 ab A | 7.74 ab B  | 9.74 ab AB |
|                    | Stomatal conductance ( <i>gs</i> ) [ $\text{mmol m}^{-2}\text{ s}^{-1}$ ]               |            |             |            |              | Stomatal conductance ( <i>gs</i> ) [ $\text{mmol m}^{-2}\text{ s}^{-1}$ ]               |            |            |            |            |
|                    | 0                                                                                       | 24         | 48          | 72         | 168          | 0                                                                                       | 24         | 48         | 72         | 168        |
|                    |                                                                                         |            |             |            |              |                                                                                         |            |            |            |            |
|                    |                                                                                         |            |             |            |              |                                                                                         |            |            |            |            |
| Positive Control   | 0.13 a A                                                                                | 0.15 a A   | 0.16 b A    | 0.17 a A   | 0.18 a A     | 0.12 a A                                                                                | 0.14 a A   | 0.15 b A   | 0.17 a A   | 0.19 a A   |
| Negative Control   | 0.11 a C                                                                                | 0.11 a BC  | 0.14 b ABC  | 0.16 a AB  | 0.17 a A     | 0.11 a A                                                                                | 0.12 a A   | 0.13 b A   | 0.15 ab A  | 0.17 ab A  |
| Fomesafen          | 0.13 a A                                                                                | 0.05 c B   | 0.15 b A    | 0.16 a A   | 0.16 a A     | 0.11 a B                                                                                | 0.08 a B   | 0.19 b A   | 0.13 ab AB | 0.11 b B   |
| Fenoxaprop-p-ethyl | 0.13 a CD                                                                               | 0.11 ab D  | 0.23 a A    | 0.19 a AB  | 0.17 a BC    | 0.17 a AB                                                                               | 0.11 a BC  | 0.18 b A   | 0.09 b C   | 0.11 b BC  |
| Fluazifop-p-butyl  | 0.12 a C                                                                                | 0.06 bc D  | 0.23 a A    | 0.16 a BC  | 0.19 a AB    | 0.16 a BC                                                                               | 0.11 a C   | 0.26 a A   | 0.20 a AB  | 0.17 ab BC |
| Clethodim          | 0.12 a BC                                                                               | 0.10 ab C  | 0.23 a A    | 0.16 a B   | 0.15 a BC    | 0.12 a B                                                                                | 0.12 a B   | 0.20 ab A  | 0.16 a AB  | 0.12 ab B  |
|                    | Transpiration rates ( <i>E</i> ) [ $\text{mmol (H}_2\text{O) m}^{-2}\text{ s}^{-1}$ ]   |            |             |            |              | Transpiration rates ( <i>E</i> ) [ $\text{mmol (H}_2\text{O) m}^{-2}\text{ s}^{-1}$ ]   |            |            |            |            |
|                    | 0                                                                                       | 24         | 48          | 72         | 168          | 0                                                                                       | 24         | 48         | 72         | 168        |
|                    |                                                                                         |            |             |            |              |                                                                                         |            |            |            |            |
|                    |                                                                                         |            |             |            |              |                                                                                         |            |            |            |            |
| Positive Control   | 2.57 a A                                                                                | 2.61 ab A  | 2.98 b A    | 3.36 a A   | 3.19 a A     | 2.18 a A                                                                                | 2.15 a A   | 2.29 b A   | 2.55 ab A  | 2.49 a A   |
| Negative Control   | 2.94 a A                                                                                | 2.77 a A   | 3.08 b A    | 3.48 a A   | 3.25 a A     | 2.09 a A                                                                                | 1.98 a A   | 2.23 b A   | 2.51 ab A  | 2.60 a A   |
| Fomesafen          | 2.73 a A                                                                                | 1.43 c B   | 3.46 b A    | 3.05 a A   | 3.11 a A     | 2.08 a B                                                                                | 2.02 a B   | 4.14 a A   | 2.62 ab B  | 2.34 a B   |
| Fenoxaprop-p-ethyl | 3.30 a BC                                                                               | 2.71 ab C  | 4.81 a A    | 3.44 a BC  | 3.66 a B     | 3.00 a AB                                                                               | 2.90 a AB  | 4.08 a A   | 1.75 b B   | 2.45 a B   |
| Fluazifop-p-butyl  | 2.71 a A                                                                                | 1.75 bc B  | 3.56 b A    | 3.58 a A   | 3.25 a A     | 3.47 a B                                                                                | 2.87 a B   | 5.21 a A   | 3.82 a AB  | 3.54 a B   |
| Clethodim          | 3.22 a B                                                                                | 2.87 a B   | 4.93 a A    | 2.76 a B   | 2.91 a B     | 2.56 a B                                                                                | 3.07 a AB  | 4.38 a A   | 3.13 ab AB | 2.66 a B   |
|                    | Maximal quantum yield of PSII photochemistry ( <i>Fv/Fm</i> )                           |            |             |            |              | Maximal quantum yield of PSII photochemistry ( <i>Fv/Fm</i> )                           |            |            |            |            |
|                    | 0                                                                                       | 24         | 48          | 72         | 168          | 0                                                                                       | 24         | 48         | 72         | 168        |
|                    |                                                                                         |            |             |            |              |                                                                                         |            |            |            |            |
|                    |                                                                                         |            |             |            |              |                                                                                         |            |            |            |            |
| Positive Control   | 0.83 a A                                                                                | 0.84 a A   | 0.84 a A    | 0.83 a A   | 0.84 a A     | 0.81 a A                                                                                | 0.82 abc A | 0.82 a A   | 0.83 ab A  | 0.84 a A   |
| Negative Control   | 0.83 a A                                                                                | 0.83 a A   | 0.83 ab A   | 0.83 a A   | 0.83 ab A    | 0.80 a A                                                                                | 0.81 c A   | 0.81 a A   | 0.82 b A   | 0.82 ab A  |
| Fomesafen          | 0.82 a AB                                                                               | 0.84 a A   | 0.84 a AB   | 0.83 a AB  | 0.81 b B     | 0.79 a A                                                                                | 0.72 d C   | 0.74 b BC  | 0.77 c AB  | 0.77 c AB  |

|                    |          |          |           |          |           |          |           |           |           |           |
|--------------------|----------|----------|-----------|----------|-----------|----------|-----------|-----------|-----------|-----------|
| Fenoxaprop-p-ethyl | 0.81 a A | 0.83 a A | 0.80 b AB | 0.82 a A | 0.78 c B  | 0.80 a A | 0.81 bc A | 0.79 a A  | 0.79 bc A | 0.77 bc A |
| Fluazifop-p-butyl  | 0.81 a A | 0.83 a A | 0.82 ab A | 0.82 a A | 0.84 ab A | 0.82 a B | 0.87 a AB | 0.82 a B  | 0.88 a A  | 0.85 a AB |
| Clethodim          | 0.81 a A | 0.82 a A | 0.82 ab A | 0.83 a A | 0.83 ab A | 0.80 a B | 0.85 ab A | 0.82 a AB | 0.82 b AB | 0.84 a AB |

---

Means followed by the same letter, lowercase in the column and uppercase in the row, do not differ from each other by Tukey's test at 5% probability.

**Supplementary Table S2.** Relative frequency (Rf), relative density (Rd), relative dominance (RDo) and importance value index (IVI) of weed species in the culture of *M. esculenta* Crantz.

| Campinas                                                |       |       |       |       | Sergipana                     |       |       |       |       |
|---------------------------------------------------------|-------|-------|-------|-------|-------------------------------|-------|-------|-------|-------|
| Species                                                 | Rf    | Rd    | RDo   | IVI   | Species                       | Rf    | Rd    | RDo   | IVI   |
| <b>Positive Control</b>                                 |       |       |       |       |                               |       |       |       |       |
| ---                                                     | 0.00  | 0.00  | 0.00  | 0.00  | ---                           | 0.00  | 0.00  | 0.00  | 0.00  |
| <b>Negative Control</b>                                 |       |       |       |       |                               |       |       |       |       |
| <i>Richardia brasiliensis</i>                           | 25.00 | 24.14 | 59.16 | 36.09 | <i>Richardia brasiliensis</i> | 20.00 | 26.67 | 53.67 | 33.45 |
| <i>Mollugo verticillata</i>                             | 25.00 | 31.03 | 37.02 | 31.02 | <i>Mollugo verticillata</i>   | 20.00 | 30.00 | 38.12 | 29.37 |
| <i>Cyperus esculentus</i>                               | 16.67 | 24.14 | 1.32  | 14.04 | <i>Cyperus esculentus</i>     | 13.33 | 13.33 | 4.74  | 10.47 |
| Other species                                           | 33.33 | 20.69 | 2.49  | 18.84 | Other species                 | 46.67 | 30.00 | 3.46  | 26.71 |
| <b>Fomesafen (250 g a.i. ha<sup>-1</sup>)</b>           |       |       |       |       |                               |       |       |       |       |
| <i>Cyperus esculentus</i>                               | 17.65 | 21.87 | 68.56 | 36.02 | <i>Cyperus esculentus</i>     | 15.00 | 20.00 | 67.87 | 34.29 |
| <i>Mollugo verticillata</i>                             | 17.65 | 25.00 | 10.48 | 17.71 | <i>Mollugo verticillata</i>   | 15.00 | 22.50 | 1.69  | 13.06 |
| <i>Eleusine indica</i>                                  | 17.65 | 18.75 | 3.28  | 13.22 | <i>Eleusine indica</i>        | 15.00 | 15.00 | 6.75  | 12.25 |
| Other species                                           | 47.06 | 34.37 | 17.68 | 33.04 | Other species                 | 55.00 | 42.50 | 23.67 | 40.39 |
| <b>Fenoxaprop-p-ethyl (100 g a.i. ha<sup>-1</sup>)</b>  |       |       |       |       |                               |       |       |       |       |
| <i>Mollugo verticillata</i>                             | 20.00 | 42.10 | 27.47 | 29.86 | <i>Cyperus esculentus</i>     | 15.38 | 16.13 | 46.81 | 26.11 |
| <i>Cyperus esculentus</i>                               | 20.00 | 26.31 | 28.79 | 25.04 | <i>Mollugo verticillata</i>   | 23.08 | 38.71 | 5.11  | 22.23 |
| <i>Richardia brasiliensis</i>                           | 13.33 | 10.53 | 22.95 | 15.61 | <i>Richardia brasiliensis</i> | 15.38 | 16.13 | 29.49 | 20.33 |
| Other species                                           | 46.67 | 21.05 | 20.77 | 29.50 | Other species                 | 46.15 | 29.03 | 18.59 | 31.26 |
| <b>Fluazifop-p-butyl (187.5 g a.i. ha<sup>-1</sup>)</b> |       |       |       |       |                               |       |       |       |       |
| <i>Cyperus esculentus</i>                               | 12.50 | 19.56 | 71.47 | 34.51 | <i>Mollugo verticillata</i>   | 23.08 | 45.71 | 22.27 | 30.55 |
| <i>Mollugo verticillata</i>                             | 12.50 | 30.43 | 12.52 | 18.48 | <i>Cyperus esculentus</i>     | 15.38 | 20.00 | 29.83 | 21.74 |
| <i>Richardia brasiliensis</i>                           | 12.50 | 8.69  | 2.44  | 7.88  | <i>Sida cordifolia</i>        | 7.69  | 8.57  | 28.55 | 14.94 |
| Other species                                           | 62.50 | 41.30 | 13.57 | 39.12 | Other species                 | 53.85 | 25.71 | 19.34 | 32.97 |
| <b>Clethodim (108 g a.i. ha<sup>-1</sup>)</b>           |       |       |       |       |                               |       |       |       |       |
| <i>Cyperus esculentus</i>                               | 15.00 | 36.17 | 68.22 | 39.79 | <i>Mollugo verticillata</i>   | 15.79 | 37.04 | 35.52 | 29.45 |
| <i>Mollugo verticillata</i>                             | 15.00 | 21.28 | 5.44  | 13.90 | <i>Cyperus esculentus</i>     | 15.79 | 16.67 | 58.53 | 30.33 |
| <i>Eleusine indica</i>                                  | 15.00 | 12.76 | 2.93  | 10.23 | <i>Sida cordifolia</i>        | 15.79 | 18.52 | 1.51  | 11.94 |
| Other species                                           | 55.00 | 29.79 | 23.41 | 36.06 | Other species                 | 52.63 | 27.78 | 4.43  | 28.28 |
